# Supplementary material
Source: MDPI journal article supplement (https://www.mdpi.com/2072-4292/11/12/1467)
Supplement: s1 [file s1]

# Supplementary Materials: Assessment of Water Storage Change in China's Lakes and Reservoirs over the Last Three Decades

Yu Fang, Huan Li, Wei Wan, Siyu Zhu, Zhongjing Wang, Yang Hong and Hao Wang

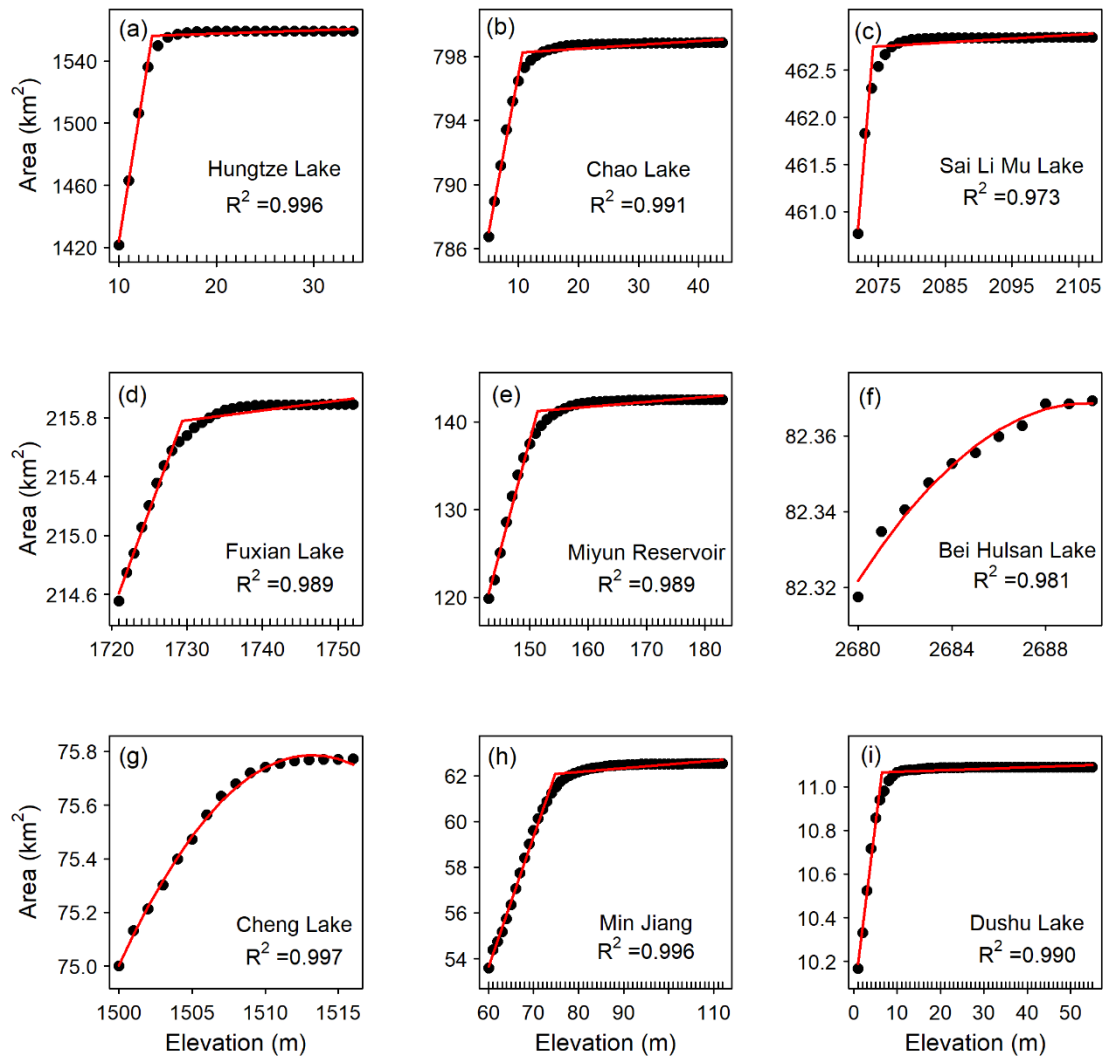

Figure S1. Hypsometric analysis for diverse sized lakes and reservoirs.

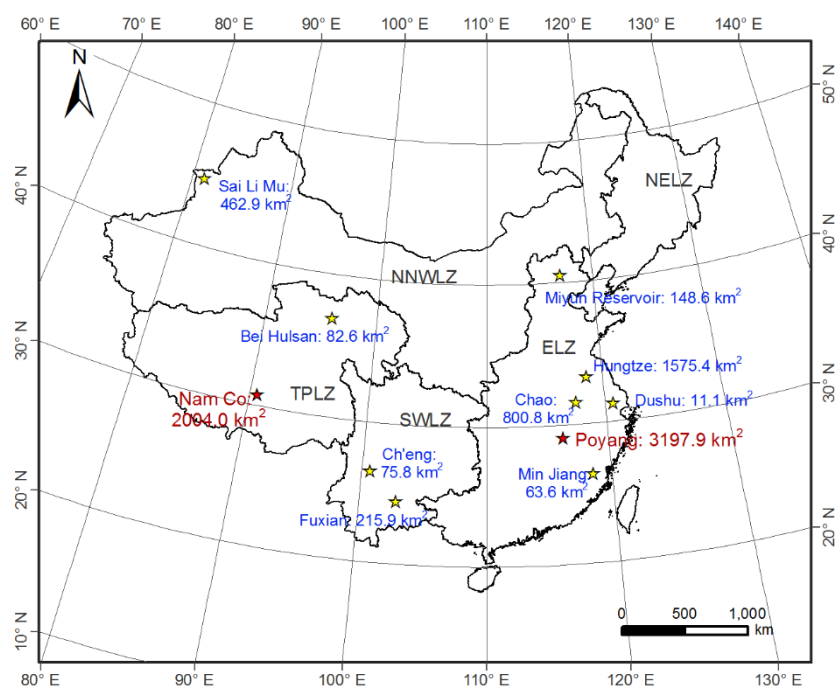

**Figure S2.** Locations of the 11 exemplary lakes and reservoirs on hypsometric analysis.
